# Supplementary material
Source: PubMed Central journal article supplement (PMC10067133)
Supplement: NIHMS1883755-supplement-Suppl-1.pdf [file NIHMS1883755-supplement-Suppl-1.pdf]

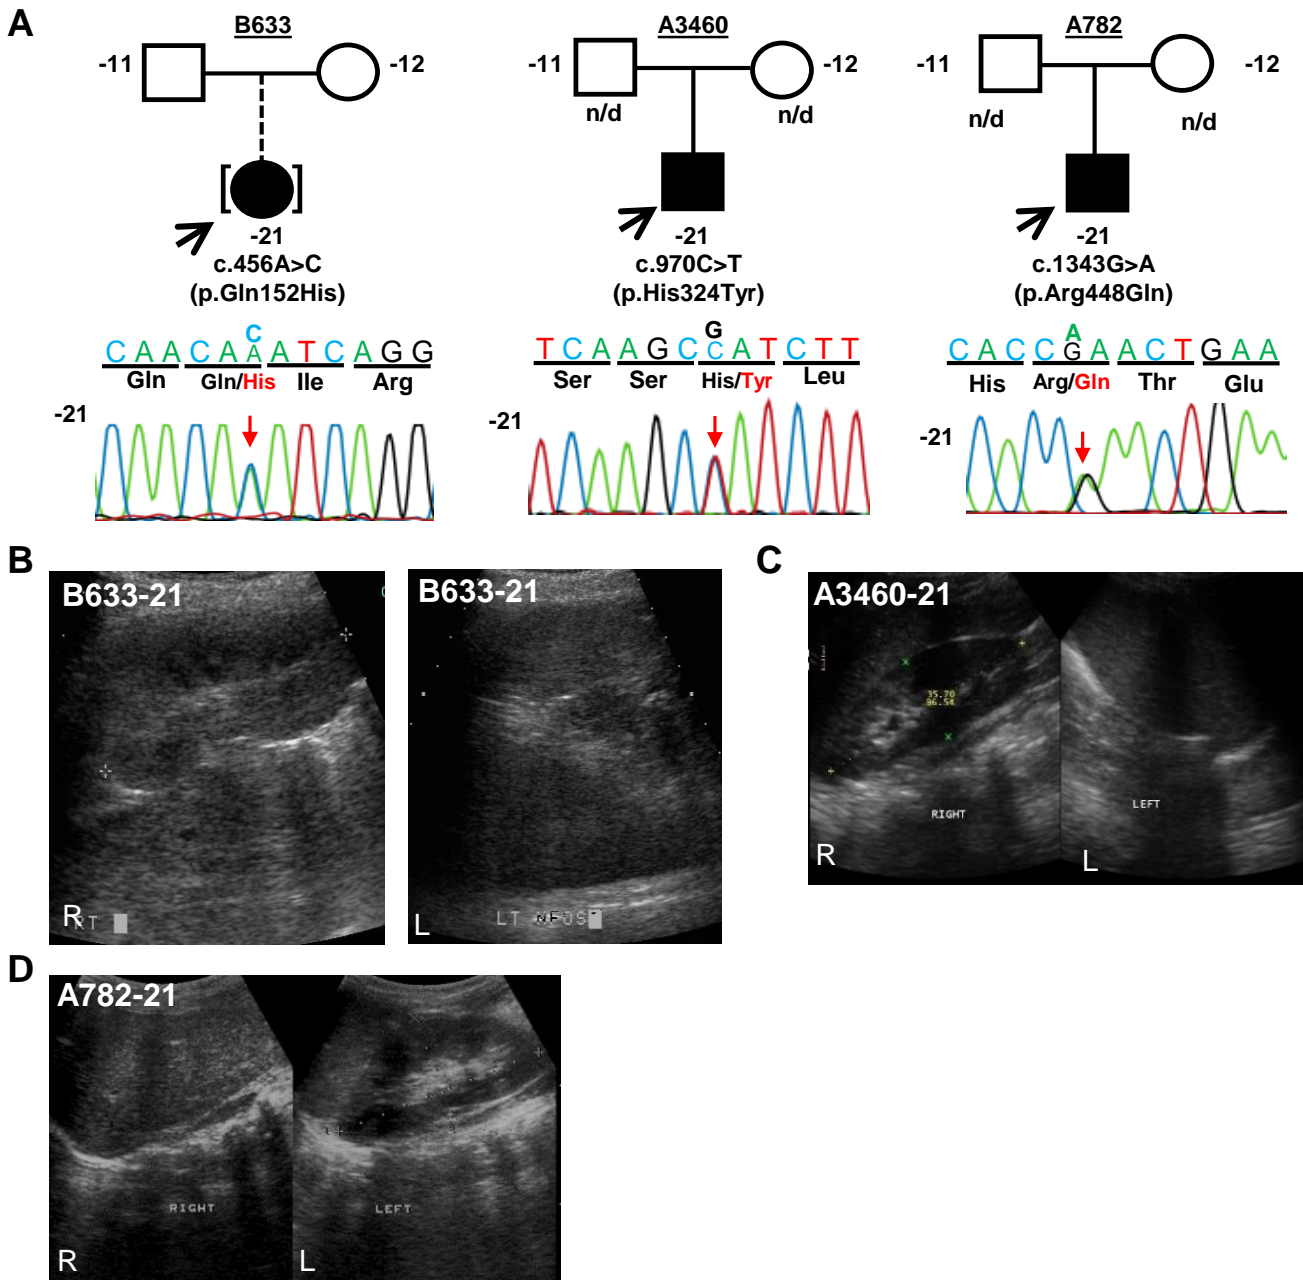

**Supplementary Figure S1. 3 CAKUT families with 3 different heterozygous *NRIP1* missense variants.**

**A)** Pedigree and genotype information for 3 CAKUT families with 3 different heterozygous *NRIP1* missense variants. Squares indicate males, circles females, filled symbols are affected individuals, open symbols indicate healthy individuals. Proband is denoted by black arrow. The proband in family B633 was adopted. In family A3460 and A782, no parental DNA was available to confirm segregation of *NRIP1*. n/d, no data.

**B)** The renal ultrasound of individual B633 demonstrates an empty left renal fossa posterior left nephrectomy with normally shaped right kidney.

**C)** The renal ultrasound of individual A3460 shows left renal agenesis with normal right kidney.

**D)** The renal ultrasound of individual A782 demonstrates right renal agenesis with normal left kidney. L, left; R, right.
