# Supplementary material
Source: PubMed Central journal article supplement (PMC10067133)
Supplement: NIHMS1883755-supplement-Suppl-2.pdf [file NIHMS1883755-supplement-Suppl-2.pdf]

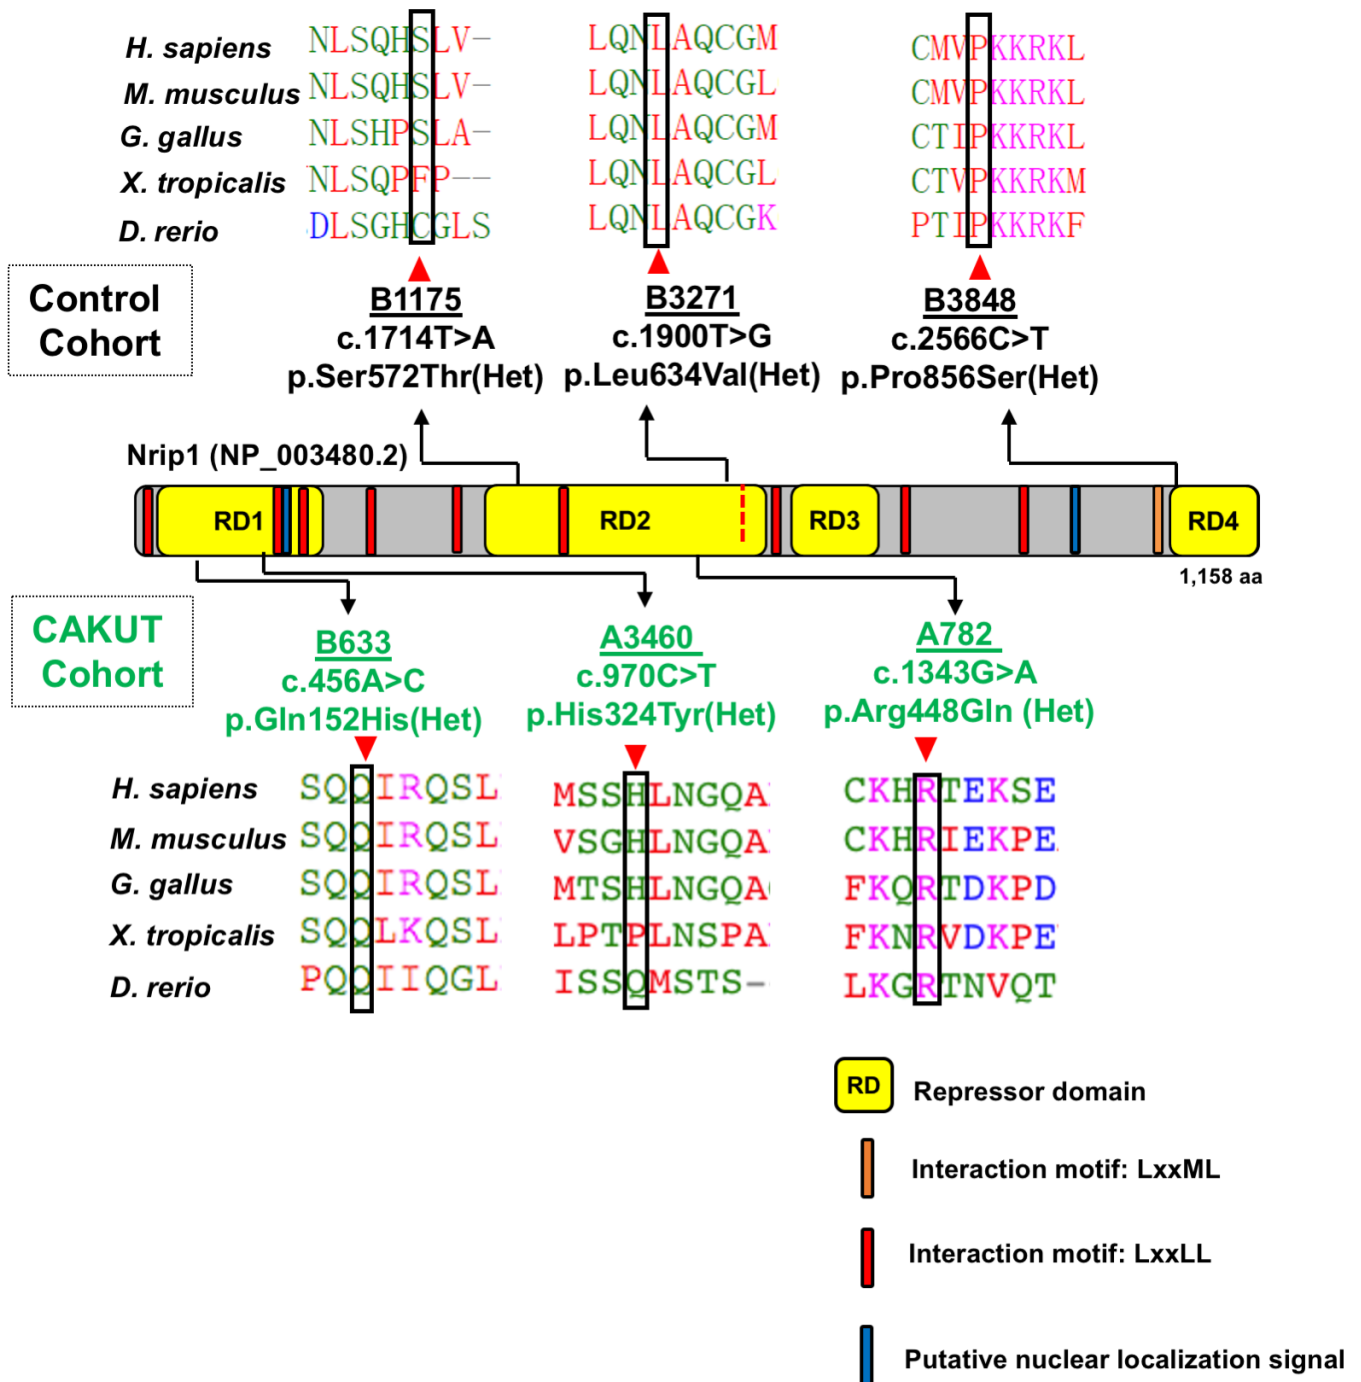

**Supplementary Figure S2 . NRIP1 missense variants identified in families with CAKUT and a control group with nephrotic syndrome.**

Protein domain schematics of human Nrip1 showing the position of each variant identified in 3 families with CAKUT and a control group with nephrotic syndrome. Upper panel showing the evolutionary conservation of amino acid positions Ser572, Leu634 and p.Pro856 in the Nrip1 protein across evolution. Lower panel showing the evolutionary conservation of amino acid positions Gln152, His324 and Arg448 in the Nrip1 protein across evolution.

bp, base pairs; aa, amino acids.
