# Supplementary material
Source: PubMed Central journal article supplement (PMC10067133)
Supplement: NIHMS1883755-supplement-Suppl-4.pdf [file NIHMS1883755-supplement-Suppl-4.pdf]

**Supplementary Table S2. 4 heterozygous missense variants of *NRIP1* in a control group with nephrotic syndrome**

| FAMILY       | Genomic position | Transcript position | Amino acid change (Het/hom) | gnomAD (hom/het/WT allele count) | PPH2 | SIFT | Mutation Taster | <i>M.m.</i> | <i>G.g.</i> | <i>X.t.</i> | <i>D.r.</i> |
|--------------|------------------|---------------------|-----------------------------|----------------------------------|------|------|-----------------|-------------|-------------|-------------|-------------|
| <b>B3848</b> | chr21:16,337,948 | c.2566C>T           | p.Pro856Ser (Het)           | 0/1/249882                       | 1.00 | D    | DC              | P           | P           | P           | P           |
| <b>B3271</b> | chr21:16,338,614 | c.1900T>G           | p.Leu634Val (Het)           | 0/3/251094                       | 1.00 | D    | DC              | L           | L           | L           | L           |
| <b>B1175</b> | chr21:16,338,800 | c.1714T>A           | p.Ser572Thr (Het)           | 0/0/Never reported               | 0.99 | T    | DC              | S           | S           | F           | C           |
| <b>B3641</b> | chr21:16,340,058 | c.456A>C            | p.Gln152His (Het)           | 0/6/282350                       | 0.97 | D    | DC              | Q           | Q           | Q           | Q           |

D, deleterious; DC, disease causing; Dr, *Danio rerio*; gnomAD, genome aggregation database (<https://gnomad.broadinstitute.org/>); gnomAD, genome aggregation database (<https://gnomad.broadinstitute.org/>); *Gg*, *gallus gallus*; Het, heterozygous; hom, homozygous; *Mm*, *Mus musculus*; PPH2 score, PolyPhen-2 prediction score (0.0–1.0; i.e.; tolerated to deleterious; variants from 0.85 to 1 are more confidently predicted to be damaging) (<http://genetics.bwh.harvard.edu/pph2/>); SIFT, sorting intolerant from tolerant (<https://sift.bii.a-star.edu.sg/>); T, tolerated; *Xt*, *xenopus tropicalis*.

Red background represents deleterious prediction by the *in silico* algorithm. Blue background represents tolerated prediction by the *in silico* algorithm. The genomic coordinates are based on genome build GRCh37 (hg19), and transcript used is NM\_003489.3.
